1  
2  
3  
4 **Low Vision Rehabilitation Training and Referral Patterns Among Ophthalmologists**

5  
6  
7 **Authors:** \*Joshua L. Robinson, OD,<sup>1</sup> Ansley Kunnath, BA<sup>2</sup>, Janice C. Law, MD<sup>1</sup>

8  
9  
10 <sup>1</sup>Assistant Professor, Ophthalmology & Visual Sciences, Vanderbilt University Medical Center

11  
12 <sup>2</sup>Student, Medical Scientist Training Program, Vanderbilt University School of Medicine

13  
14  
15 \*Corresponding author

16  
17 **Corresponding Author:**

18  
19  
20 Joshua L. Robinson, OD, FAAO

21  
22 Assistant Professor, Ophthalmology & Visual Sciences, Vanderbilt University Medical Center

23  
24  
25 Director, Low Vision Rehabilitation, Vanderbilt Eye Institute

26  
27  
28 2311 Pierce Avenue, Suite 2211, Nashville, TN 37232

29  
30  
31 Phone: 615-875-3153; Fax: 615-936-1540

32  
33  
34 Email: [joshua.robinson@vumc.org](mailto:joshua.robinson@vumc.org)

35  
36  
37  
38  
39  
40  
41  
42  
43  
44  
45  
46  
47  
48  
49  
50  
51  
52  
53  
54  
55  
56  
57  
58  
59  
60  
61  
62  
63  
64  
65

1  
2  
3  
4 **Abstract**  
5

6  
7 **Objective:** Vision impairment represents a growing burden to society and training protocols  
8  
9 related to low vision rehabilitation (vision rehab) vary across ophthalmology residency  
10  
11 programs. We surveyed practicing ophthalmologists regarding their vision rehab knowledge,  
12  
13 confidence levels, and referral thresholds. We categorized subjects and compared response  
14  
15 patterns between groups.  
16  
17

18  
19  
20 **Design:** Prospective observational  
21

22  
23 **Subjects:** 185 practicing ophthalmologists  
24

25  
26 **Methods:** We created an Ophthalmology Low Vision Questionnaire and administered it to all  
27  
28 enrolled subjects via email. We categorized subjects based on duration of practice, subspecialty  
29  
30 area, and exposure to vision rehab during residency training. We drew conclusions by  
31  
32 comparing responses between various subject categories.  
33  
34

35  
36 **Main Outcome Measures:** The primary outcome measure was comparison of confidence levels  
37  
38 and thresholds for vision rehab referral across groups. We used statistical tests to look for  
39  
40 associations between practice duration, subspecialty area, vision rehab exposure during  
41  
42 residency, and referral patterns.  
43  
44

45  
46 **Results:** Ophthalmologists practicing for 6 or less years were more likely to have had a formal  
47  
48 vision rehab rotation during their residency training compared to ophthalmologists practicing  
49  
50 for 7 or more years ( $P = 0.03$ ). Ophthalmologists who completed a formal vision rehab rotation  
51  
52 during residency reported greater confidence in their ability to appropriately identify patients  
53  
54 who could benefit from vision rehab referral ( $P = 0.04$ ) and referred patients at earlier visual  
55  
56  
57  
58  
59  
60  
61  
62  
63  
64  
65

1  
2  
3  
4 acuity thresholds ( $P = 0.04$ ). Clinical subspecialty did not have a significant effect on vision  
5  
6 rehab referral confidence or thresholds.  
7

8  
9 **Conclusions:** Vision rehab rotations during residency lead to improved referral confidence and  
10  
11 earlier referral for these vital services. Standardization of vision rehab exposure across  
12  
13 ophthalmology residency programs can help to improve outcomes for visually impaired  
14  
15 patients.  
16  
17

18  
19 **Keywords:** low vision rehabilitation, vision rehab, ophthalmology, residency, training, referral  
20  
21

## 22 Introduction

23  
24  
25 Permanent visual impairment is a rapidly growing issue which represents a large burden  
26  
27 to both the visually impaired individual and to society.<sup>1-3</sup> In 2013, the total economic burden of  
28  
29 eye disorders and vision loss in the United States was about \$139 billion.<sup>4</sup> A discipline known as  
30  
31 low vision rehabilitation (vision rehab) aims to relieve that burden and allow visually impaired  
32  
33 individuals to maximize their independence and quality of life.<sup>5</sup>  
34  
35

36  
37  
38 While provision of clinical vision rehab services is often undertaken by optometrists,  
39  
40 ophthalmologists play an important role in identifying and referring patients who need these  
41  
42 services. Within the past several years, the American Academy of Ophthalmology (Academy)  
43  
44 has advocated for early referral to vision rehab programs as the standard of care for patients  
45  
46 who suffer from irreversible vision loss.<sup>6</sup> The Accreditation Council for Graduate Medical  
47  
48 Education (ACGME) states in their Common Program Requirements that ophthalmology  
49  
50 residents must have access to faculty members with expertise in vision rehab and must  
51  
52 demonstrate competence in their knowledge of vision rehab.<sup>7</sup> This broad guidance allows  
53  
54  
55  
56  
57  
58  
59  
60  
61  
62  
63  
64  
65

1  
2  
3  
4 ophthalmology residency programs to remain highly variable in the amount of vision rehab  
5  
6  
7 exposure received by trainees.

8  
9  
10 This survey-based study aimed to assess practicing ophthalmologists' levels of  
11  
12 understanding, referral confidence, and utilization of vision rehab services. Analysis of these  
13  
14 findings can increase awareness and understanding of vision rehab as a key treatment modality  
15  
16 in caring for those with impaired vision, a population which is expected to continue to grow  
17  
18 worldwide.<sup>1</sup>

## 21 **Methods**

22  
23  
24  
25 This study was approved by the Institutional Review Board at Vanderbilt University and  
26  
27 followed the tenets of the Declaration of Helsinki. The study was approved with consent  
28  
29 exemption.

30  
31  
32  
33 We developed a survey (Appendix) to assess perceptions and practices related to vision  
34  
35 rehab referrals among ophthalmologists. We invited practicing ophthalmologists, regardless of  
36  
37 subspecialty area or duration of practice, to be included in the study. We excluded physicians  
38  
39 currently in residency or fellowship training programs.

40  
41  
42  
43 We enrolled subjects via Academy email groups and social media solicitation. We sent  
44  
45 physicians who agreed to voluntary inclusion in the study a link to an anonymous RedCap  
46  
47 survey via email. We drew conclusions through compilation and statistical analysis of the survey  
48  
49 responses.

## 50 **Statistical Analysis**

51  
52  
53  
54 We analyzed data in groups based on subjects' duration of practice, subspecialty  
55  
56 practice area, and self-reported exposure during residency to vision rehab programs. We used  
57  
58  
59  
60  
61  
62  
63  
64  
65

1  
2  
3  
4 chi-squared tests to compare the percentage of participants within a specific group that  
5  
6  
7 answered “yes” to each question. We used one-way ANOVA and two-tailed, unpaired t-tests to  
8  
9  
10 compare the mean confidence level and referral criteria of different groups.

## 11 **Results**

12  
13  
14 A total of 185 ophthalmologists and one optometrist responded to this survey. The  
15  
16  
17 responses of the lone optometrist were excluded. Results for the 185 ophthalmologists  
18  
19  
20 surveyed are summarized in Table 1.

21  
22 Ophthalmologists practicing for six or less years were more likely to have had a formal  
23  
24  
25 vision rehab rotation during their residency training compared to ophthalmologists practicing  
26  
27  
28 for seven or more years ( $P = 0.03$ ). Ophthalmologists who completed a formal vision rehab  
29  
30  
31 rotation during residency reported greater confidence in their ability to appropriately identify  
32  
33  
34 patients who could benefit from vision rehab referral ( $P = 0.04$ ) and referred patients for vision  
35  
36  
37 rehab at earlier visual acuity thresholds ( $P = 0.04$ ) compared to ophthalmologists who did not  
38  
39  
40 complete a formal rotation during residency.

41  
42 Ophthalmologists practicing for ten or less years were more likely to have had  
43  
44  
45 occupational therapists (OT) or certified low vision therapists (CLVT) as referral options at their  
46  
47  
48 residency institution compared to ophthalmologists practicing for over ten years ( $P = 0.01$ ).  
49  
50  
51 However, access to OT and CLVT during residency did not significantly affect ophthalmologists’  
52  
53  
54 vision rehab referral confidence or visual acuity thresholds.

55  
56 Ophthalmologists practicing for over ten years were more likely to refer patients to  
57  
58  
59 vision rehab services in their own clinics ( $P = 0.001$ ), but less likely to refer to other providers in  
60  
61  
62 their community ( $P = 0.03$ ) compared to ophthalmologists practicing ten years or less.  
63  
64  
65

1  
2  
3  
4 The clinical subspecialty of the ophthalmologists surveyed did not have a significant  
5  
6  
7 effect on vision rehab referral confidence or thresholds.  
8

9  
10 **Discussion**

11  
12 Current ACGME requirements allow for variable levels of vision rehab training among  
13  
14 ophthalmology residency programs. Therefore, it is critical to analyze the effects of vision rehab  
15  
16 training during residency on future referrals once trainees have graduated and entered clinical  
17  
18 practice. This study specifically examines ophthalmologists' confidence in identifying  
19  
20 appropriate patients for vision rehab referrals and the visual criteria, including best-corrected  
21  
22 visual acuity, used when referring. These metrics are important to characterize because early  
23  
24 referral to vision rehab programs has been shown to improve outcomes.<sup>8</sup>  
25  
26  
27  
28  
29

30 Approximately five years prior to this study, the Academy released a statement defining  
31  
32 early referral for vision rehab services as the standard of care for patients with vision loss.<sup>9</sup>  
33  
34 Within this statement, the Academy made it clear that referral is indicated when a patient  
35  
36 demonstrates best-corrected visual acuity of less than 20/40, scotomata, visual field loss, or  
37  
38 contrast sensitivity loss which interferes with their daily activities.<sup>9</sup> Early referral and treatment  
39  
40 are vital to help prevent loss of reading ability, independence, mobility skills, and quality of life  
41  
42 for those experiencing vision impairment.<sup>9,10</sup> Our findings show that trainees who have  
43  
44 graduated since the Academy's effort to promote early vision rehab referral are more likely to  
45  
46 have had a vision rehab rotation during residency. These physicians are also making earlier  
47  
48 referrals than their predecessors. This suggests that the Academy's efforts may be moving the  
49  
50 needle in a positive direction for visually impaired patients. It also indicates that ophthalmology  
51  
52 residents would benefit from more structured vision rehab training mandates.  
53  
54  
55  
56  
57  
58  
59  
60  
61  
62  
63  
64  
65

1  
2  
3  
4 The observation that internal vision rehab referrals are more likely to be made by  
5  
6  
7 ophthalmologists practicing for more than ten years may be due primarily to practice modality.  
8  
9  
10 Our survey did not ask about practice modality, but many vision rehab programs are found in  
11  
12 academic settings. It is possible that longer-practicing ophthalmologists are more likely to be in  
13  
14 settings which offer vision rehab services and therefore internal referrals are more common  
15  
16 than to referring out for vision rehab services in this demographic.  
17  
18

19  
20 There are several barriers for eligible patients to access vision rehab services; including  
21  
22 lack of provider referrals, awareness of benefits, transportation, and financial resources.<sup>11,12</sup>  
23  
24  
25 Expanding vision rehab training during residency can help alleviate some of this burden by  
26  
27 preparing ophthalmologists to provide timely referrals and to educate patients about the  
28  
29 availability and benefits of these services. Increased education and utilization will improve  
30  
31 public awareness of vision rehab services, perhaps impacting downstream funding support and  
32  
33 alleviating some of the cost-related concerns noted above.  
34  
35  
36

37  
38 Our findings lay the groundwork for a more comprehensive investigation of vision rehab  
39  
40 referral patterns and training protocols among ophthalmologists. Our decision to recruit via  
41  
42 email and social media solicitations may have caused the cohort to skew toward  
43  
44 ophthalmologists earlier in their careers, as approximately 74% of subjects reported having  
45  
46 been in practice for six years or less. A more formal survey of a larger and more representative  
47  
48 cohort of practicing ophthalmologists, perhaps administered through the Academy itself, would  
49  
50 be valuable. Another limitation of our study lies in the ability of physicians to accurately recall  
51  
52 components of a training program which they may have completed over a decade ago. Pairing  
53  
54 future studies with a formal survey of ophthalmology residency program directors may also  
55  
56  
57  
58  
59  
60  
61  
62  
63  
64  
65

1  
2  
3  
4 help to corroborate responses and lead to more reliable conclusions. Finally, the temporal  
5  
6  
7 correlation between Academy efforts to promote early vision rehab referral and increasing  
8  
9  
10 residency exposure and referral confidence among ophthalmologists may not represent true  
11  
12 causation.  
13

### 14 **Acknowledgments**

15  
16  
17 The study was supported in part by a Research to Prevent Blindness unrestricted grant to the  
18  
19  
20 Vanderbilt Eye Institute. The sponsor or funding organization had no role in the design or  
21  
22  
23 conduct of this research.  
24

### 25 **References**

- 26  
27 1. Varma R, Vajaranant TS, Burkemper B, et al. Visual impairment and blindness in adults in  
28  
29  
30 the United States: Demographic and geographic variations from 2015 to 2050. JAMA  
31  
32  
33 Ophthalmol. 2016;134:802-809  
34
- 35 2. Dandona L, Dandona R. What is the global burden of visual impairment? BMC  
36  
37  
38 Med. 2006;4:6  
39
- 40 3. Wittenborn JS, Zhang X, Feagan CW, et al. The economic burden of vision loss and eye  
41  
42  
43 disorders among the United States population younger than 40 years. JAMA  
44  
45  
46 Ophthalmol. 2013;120:1728-1735  
47
- 48 4. Wittenborn J, Rein D. Cost of vision problems: The economic burden of vision loss and  
49  
50  
51 eye disorders in the United States. Chicago, IL: NORC at the University of Chicago; 2013  
52
- 53 5. Stelmack J. Quality of life of low-vision patients and outcomes of low-vision  
54  
55  
56 rehabilitation. Optom Vis Sci. 2001;78:335-342  
57  
58  
59  
60  
61  
62  
63  
64  
65



1  
2  
3  
4  
5  
6  
7  
8  
9  
10  
11  
12  
13  
14  
15  
16  
17  
18  
19  
20  
21  
22  
23  
24  
25  
26  
27  
28  
29  
30  
31  
32  
33  
34  
35  
36  
37  
38  
39  
40  
41  
42  
43  
44  
45  
46  
47  
48  
49  
50  
51  
52  
53  
54  
55  
56  
57  
58  
59  
60  
61  
62  
63  
64  
65

6. Fontenot JL, Bona MD, Kaleem MA, et al. American Academy of Ophthalmology Preferred Practice Pattern Vision Rehabilitation Committee Vision Rehabilitation Preferred Practice Pattern®. Ophthalmology. 2018;125:228-278
7. Accreditation Council for Graduate Medical Education. ACGME Program Requirements for Graduate Medical Education in Ophthalmology. 2020. Available at: [https://www.acgme.org/Portals/0/PFAssets/ProgramRequirements/240\\_Ophthalmology\\_2020\\_July.pdf?ver=2020-06-30-144437-230](https://www.acgme.org/Portals/0/PFAssets/ProgramRequirements/240_Ophthalmology_2020_July.pdf?ver=2020-06-30-144437-230). Accessed May 28, 2021
8. Shah P, Schwartz SG, Gartner S, Scott IU, Flynn HW, Jr. Low vision services: a practical guide for the clinician. Ther Adv Ophthalmol. 2018 Jun 11;10:2515841418776264
9. The Academy's Initiative in Vision Rehabilitation. The American Academy of Ophthalmology. 2016. Available at: <https://www.aao.org/low-vision-and-vision-rehab>. Accessed May 14, 2021
10. van Nispen RM, Virgili G, Hoeben M, et al. Low vision rehabilitation for better quality of life in visually impaired adults. Cochrane Database Syst Rev. 2020 Jan 27;1:CD006543
11. Pollard TL, Simpson JA, Lamoureux EL, Keeffe JE. Barriers to accessing low vision services. Ophthalmic Physiol Opt. 2003;23:321-327
12. Overbury O, Wittich W. Barriers to low vision rehabilitation: The Montreal Barriers Study. Invest Ophthalmol Vis Sci. 2011;52:8933-8938

1  
2  
3  
4 **Appendix**  
5  
6

7 **Ophthalmology Low Vision Questionnaire**  
8  
9

10 1. Did you have a formal low vision rehabilitation (VR) rotation during residency?

11 Yes No  
12  
13

14 2. Were occupational therapists and/or certified low vision therapists available referral  
15 options at your residency institution?  
16

17 Yes No Unsure  
18  
19

20 3. What clinical findings would prompt you to refer to VR, if any? Please select all that apply.

- 21 • Reduced best-corrected visual acuity  
22 • Visual field loss  
23 • Decreased contrast sensitivity  
24 • Other (describe):  
25  
26  
27  
28

29 4. At what best-corrected visual acuity level would you first consider referring a patient to VR?  
30 Please circle one, if applicable.  
31

32 20/25 to 20/63 20/80 to 20/160 20/200 to 20/400 worse than 20/400  
33  
34

35 5. Since being in practice, have you referred patients to VR?

36 Yes No  
37  
38

39 6. What VR resources do you present to visually impaired patients, if any? Select all that apply.

- 40 • My clinical practice offers these services  
41 • State-run services  
42 • Non-governmental organizations  
43 • Community based providers  
44 • Online AAO resources  
45 • Other (describe):  
46  
47  
48  
49  
50

51 7. How confident are you in your ability to appropriately identify patients who could benefit  
52 from VR, on a scale of 1 to 5? (1 = very confident, 5 = not at all confident)  
53

54 1 2 3 4 5  
55  
56

57 8. Please indicate your subspecialty area of clinical practice within ophthalmology, if  
58 applicable:  
59  
60  
61  
62  
63  
64  
65

1  
2  
3  
4  
5  
6  
7  
8  
9  
10  
11  
12  
13  
14  
15  
16  
17  
18  
19  
20  
21  
22  
23  
24  
25  
26  
27  
28  
29  
30  
31  
32  
33  
34  
35  
36  
37  
38  
39  
40  
41  
42  
43  
44  
45  
46  
47  
48  
49  
50  
51  
52  
53  
54  
55  
56  
57  
58  
59  
60  
61  
62  
63  
64  
65

9. How long ago did you complete your training?

<3 years

3-6 years

7-10 years

>10 years

**Table 1****Comparison of Low Vision Rehabilitation Training and Referrals by Duration of Practice**

| Years in Practice                                 | < 3 years | 3 to 6 years | 7 to 10 years | > 10 years |
|---------------------------------------------------|-----------|--------------|---------------|------------|
| <b>Number of Subjects (%)</b>                     | 66 (36)   | 70 (38)      | 21 (11)       | 28 (15)    |
| <b>Residency Training</b>                         |           |              |               |            |
| Had VR rotation, No. (%)                          | 38 (58)   | 36 (51)      | 8 (38)        | 10 (36)    |
| Had OT or CLVTs, No. (%) <sup>a</sup>             | 52 (85)   | 44 (69)      | 15 (75)       | 13 (52)    |
| <b>VR Referral</b>                                |           |              |               |            |
| Has referred to VR, No. (%)                       | 54 (82)   | 65 (93)      | 19 (90)       | 26 (93)    |
| Confidence from 1-5 (mean)                        | 3.71      | 3.66         | 3.67          | 3.89       |
| <b>Indication for VR Referral<sup>b</sup></b>     |           |              |               |            |
| Reduced BCVA, No. (%)                             | 62 (94)   | 67 (96)      | 21 (100)      | 27 (96)    |
| Visual field loss, No. (%)                        | 59 (89)   | 64 (91)      | 17 (81)       | 24 (86)    |
| Decreased CS, No. (%)                             | 32 (48)   | 25 (36)      | 7 (33)        | 9 (32)     |
| Other, No. (%)                                    | 8 (12)    | 8 (11)       | 2 (10)        | 2 (7)      |
| <b>BCVA Threshold for VR Referral<sup>c</sup></b> |           |              |               |            |
| 20/25 to 20/63, No. (%)                           | 11 (18)   | 17 (25)      | 5 (24)        | 10 (37)    |
| 20/80 to 20/160, No. (%)                          | 32 (52)   | 33 (49)      | 7 (33)        | 12 (44)    |
| 20/200 to 20/400, No. (%)                         | 18 (29)   | 17 (25)      | 8 (38)        | 4 (15)     |
| worse than 20/400, No. (%)                        | 1 (2)     | 0 (0)        | 1 (5)         | 1 (4)      |
| <b>VR Resources Presented<sup>a</sup></b>         |           |              |               |            |
| VR services within clinic, No. (%)                | 25 (38)   | 17 (24)      | 8 (38)        | 19 (68)    |
| Community VR providers, No. (%)                   | 33 (50)   | 50 (71)      | 14 (67)       | 13 (46)    |
| State-based resources, No. (%)                    | 30 (45)   | 29 (41)      | 8 (38)        | 8 (29)     |
| Non-governmental org, No. (%)                     | 20 (30)   | 20 (29)      | 7 (33)        | 8 (29)     |
| Online or AAO resources, No. (%)                  | 8 (12)    | 11 (16)      | 0 (0)         | 8 (29)     |
| Other, No. (%)                                    | 3 (5)     | 1 (1)        | 1 (5)         | 0 (0)      |

<sup>a</sup>subjects who responded "unsure" (n = 15) were excluded from percentage calculations

<sup>b</sup>some subjects responded "yes" to multiple options

<sup>c</sup>subjects who did not respond (n = 8) were excluded from percentage calculations

VR: vision rehabilitation

OT: occupational therapist

CLVT: certified low vision therapist

BCVA: best-corrected visual acuity

CS: contrast sensitivity

AAO: American Academy of Ophthalmology
